# Supplementary material for: Adapted motivational interviewing to improve the uptake of treatment for glaucoma in Nigeria: study protocol for a randomized controlled trial
Source: PubMed Central journal article supplement (PMC4021714; doi:10.1186/1745-6215-15-149), 2014-04-29
Supplement: 1745-6215-15-149-S1.pdf [file 1745-6215-15-149-S1.pdf]

|                    |
|--------------------|
| <b>OPTOMETRIST</b> |
| Snellen Visual a   |
| Screen for glauc   |
| Complete Screenir  |

|                               |
|-------------------------------|
| <b>Not a glaucoma suspect</b> |
| Continue usual care           |

|                     |
|---------------------|
| <b>Not glaucoma</b> |
| Continue usual care |

|                     |
|---------------------|
| <b>Not eligible</b> |
| Continue usual care |

Note: If the hospital cancels surgery, and a new date for surgery is given, the "clock starts again" and the two month deadline worked out again

|                               |
|-------------------------------|
| <b>Refuse to participate</b>  |
| Complete "reasons why refuse" |

|                                                              |
|--------------------------------------------------------------|
| <b>Not randomised to MIG</b>                                 |
| Give "Silent Thief of Sight"                                 |
| Check that a follow up appoinment has been given for 1 month |
| Say goodbye                                                  |

**ON 1st POST SURGERY DAY |**

**ON TRACING DATE |**

**FOLLOW UP**

**NURSE**  
Acuity  
Glaucoma  
Referral form

**Glaucoma suspected**  
Take to ophthalmologist

**OPHTHALMOLOGIST**  
Detailed examination for glaucoma  
Send for visual fields and disc photos

**VISUAL FIELD TESTERS**  
Visual fields, LogMAR VA disc photos  
Print out visual fields. Add date and name

**OPHTHALMOLOGIST**  
Confirm that eligible to be recruited  
Select study eye  
Give date for surgery. Inform patient  
Enter name in surgery book  
Briefly explain that the hospital is doing a study  
Take to Project Manager with eligibility form

**PROJECT MANAGER**  
Enroll: give/read out information sheet.  
Take consent: keep a copy; give participant a copy

**Agree to participate**  
**Issue a unique study number**  
Enter data into Excel spreadsheet  
Return participant to ophthalmologist  
Complete Section 2 of MAIN Form  
Enter surgery date and tracing dates in Excel  
Accompany to ophthalmologist

**OPHTHALMOLOGIST**  
Complete Section 1 and Section 3 of MAIN FORM  
Accompany to interviewers

**INTERVIEWERS**  
Check name of participant against forms  
Check Study no is written on ALL forms & visual fields

**Randomization to MIG or no MIG**  
Take next **brown** envelop: write study no & name on it

Enter sequence number in Section 1 of MAIN Form  
Open the envelop. Note if MIG or not  
Put envelop in sealed container

**Randomization to interviewer A or B**  
Take next **white** envelop: write study no & name on it  
Open the envelop. Note which interviewer  
Put envelop in sealed container

**Perform MIG: first session**  
Complete the "working alliance inventory for MI" form for both interviewer and patient  
Give "Silent Thief of Sight"  
Check date given for surgery: confirm with participant  
Check name/date/study no in surgery book  
Give date for second session if required

**Perform MIG: second session**  
Complete the "working alliance inventory for MI" form for both interviewer and patient

**ASSESSING TRIAL OUTCOME**  
**PROJECT MANAGER / Dr Abdull**  
Update surgery date and tracing date, if needed  
Check whether patient had surgery on surgery date  
If yes, complete Section 4 of main form

**IF NO - WAIT UNTIL TRACING DATE**  
On tracing date, call to see if they have had surgery  
Complete lower parts of section 1 and 4  
If they have not had surgery ask why not  
If they have not had surgery and still want it, ask them to return to the hospital for reassessment

Examine patient and fill section 5 for follow up in 1,2,4,6 and 12 months respectively
