# Supplementary material for: Adapted motivational interviewing to improve the uptake of treatment for glaucoma in Nigeria: study protocol for a randomized controlled trial
Source: PubMed Central journal article supplement (PMC4021714; doi:10.1186/1745-6215-15-149), 2014-04-29
Supplement: 1745-6215-15-149-S3.pdf [file 1745-6215-15-149-S3.pdf]

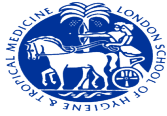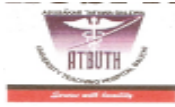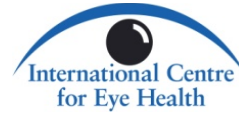

**Randomised Controlled Trial of Adapted Motivational Interviewing for  
Acceptance and Adherence to Treatment in Glaucoma Patients in Bauchi**

**Working Alliance Inventory- Interviewer**

**Study number**

**Hospital registration number**

**Interviewer ID**

**Date**        
Day Month Year

**Measurement Point (circle one):**  1st MIG  2nd MIG

On the following page there are sentences that describe some of the different ways you might think or feel about your patient.

As you read the sentences mentally insert the name of your patient in place of \_\_\_\_\_ in the text. Below each statement there is a seven point scale:

|       |        |              |           |       |            |        |
|-------|--------|--------------|-----------|-------|------------|--------|
| 1     | 2      | 3            | 4         | 5     | 6          | 7      |
| Never | Rarely | Occasionally | Sometimes | Often | Very Often | Always |

If the statement describes the way you *always* feel (or think) circle the number 7; If it never applies to you, circle the number 1. Use the numbers in between to describe the variations between these extremes.

Work quickly, your first impressions are the ones we would like to see.

**PLEASE DON'T FORGET TO RESPOND TO EVERY ITEM.**

Thank You

1 \_\_\_\_\_ and I agree about the steps to be taken to improve his situation.

|       |        |              |           |       |            |        |
|-------|--------|--------------|-----------|-------|------------|--------|
| 1     | 2      | 3            | 4         | 5     | 6          | 7      |
| Never | Rarely | Occasionally | Sometimes | Often | Very Often | Always |

2 My client and I both feel confident about the usefulness of our current activity in counseling.

|       |        |              |           |       |            |        |
|-------|--------|--------------|-----------|-------|------------|--------|
| 1     | 2      | 3            | 4         | 5     | 6          | 7      |
| Never | Rarely | Occasionally | Sometimes | Often | Very Often | Always |

3 I believe \_\_\_\_\_ likes me.

|       |        |              |           |       |            |        |
|-------|--------|--------------|-----------|-------|------------|--------|
| 1     | 2      | 3            | 4         | 5     | 6          | 7      |
| Never | Rarely | Occasionally | Sometimes | Often | Very Often | Always |

4 \_\_\_\_\_ have doubts about what we are trying to accomplish in counseling.

|       |        |              |           |       |            |        |
|-------|--------|--------------|-----------|-------|------------|--------|
| 1     | 2      | 3            | 4         | 5     | 6          | 7      |
| Never | Rarely | Occasionally | Sometimes | Often | Very Often | Always |

5 I am confident in my ability to help \_\_\_\_\_.

|       |        |              |           |       |            |        |
|-------|--------|--------------|-----------|-------|------------|--------|
| 1     | 2      | 3            | 4         | 5     | 6          | 7      |
| Never | Rarely | Occasionally | Sometimes | Often | Very Often | Always |

6 We are working towards mutually agreed upon goals.

|       |        |              |           |       |            |        |
|-------|--------|--------------|-----------|-------|------------|--------|
| 1     | 2      | 3            | 4         | 5     | 6          | 7      |
| Never | Rarely | Occasionally | Sometimes | Often | Very Often | Always |

7 I appreciate \_\_\_\_\_ as a person.

|       |        |              |           |       |            |        |
|-------|--------|--------------|-----------|-------|------------|--------|
| 1     | 2      | 3            | 4         | 5     | 6          | 7      |
| Never | Rarely | Occasionally | Sometimes | Often | Very Often | Always |

8 We agree on what is important for \_\_\_\_\_ to work on.

|       |        |              |           |       |            |        |
|-------|--------|--------------|-----------|-------|------------|--------|
| 1     | 2      | 3            | 4         | 5     | 6          | 7      |
| Never | Rarely | Occasionally | Sometimes | Often | Very Often | Always |

9 \_\_\_\_\_ and I have built a mutual trust.

|       |        |              |           |       |            |        |
|-------|--------|--------------|-----------|-------|------------|--------|
| 1     | 2      | 3            | 4         | 5     | 6          | 7      |
| Never | Rarely | Occasionally | Sometimes | Often | Very Often | Always |

10 \_\_\_\_\_ and I have different ideas on what his real problems are.

|       |        |              |           |       |            |        |
|-------|--------|--------------|-----------|-------|------------|--------|
| 1     | 2      | 3            | 4         | 5     | 6          | 7      |
| Never | Rarely | Occasionally | Sometimes | Often | Very Often | Always |

11 We have established a good understanding between us of the kind of changes that would be good for \_\_\_\_\_.

|       |        |              |           |       |            |        |
|-------|--------|--------------|-----------|-------|------------|--------|
| 1     | 2      | 3            | 4         | 5     | 6          | 7      |
| Never | Rarely | Occasionally | Sometimes | Often | Very Often | Always |

12 \_\_\_\_\_ believes the way we are working with her problem is correct.

|       |        |              |           |       |            |        |
|-------|--------|--------------|-----------|-------|------------|--------|
| 1     | 2      | 3            | 4         | 5     | 6          | 7      |
| Never | Rarely | Occasionally | Sometimes | Often | Very Often | Always |
