# Supplementary material for: Adapted motivational interviewing to improve the uptake of treatment for glaucoma in Nigeria: study protocol for a randomized controlled trial
Source: PubMed Central journal article supplement (PMC4021714; doi:10.1186/1745-6215-15-149), 2014-04-29
Supplement: 1745-6215-15-149-S4.pdf [file 1745-6215-15-149-S4.pdf]

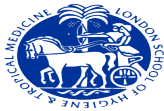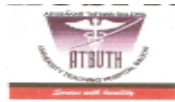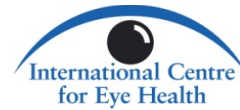

**Randomised Controlled Trial of Adapted Motivational Interviewing for  
Acceptance and Adherence to Treatment in Glaucoma Patients in Bauchi**

**Working Alliance Inventory- Patient**

Name \_\_\_\_\_

Study number 

|  |  |  |
|--|--|--|
|  |  |  |
|--|--|--|

Hospital registration number 

|  |  |  |  |  |  |  |
|--|--|--|--|--|--|--|
|  |  |  |  |  |  |  |
|--|--|--|--|--|--|--|

Interviewer ID 

|  |  |
|--|--|
|  |  |
|--|--|

Date 

|  |  |  |  |  |  |
|--|--|--|--|--|--|
|  |  |  |  |  |  |
|--|--|--|--|--|--|

  
Day Month Year

Measurement Point (circle one): 

|         |         |
|---------|---------|
| 1st MIG | 2nd MIG |
|---------|---------|

Indication for second interview

|   |                                                     |
|---|-----------------------------------------------------|
| 1 | Could not stay for the MIG on day of recruitment    |
| 2 | Interview not completed as participant had to leave |
| 3 | Frequent interruptions from escort                  |
|   | Other _____                                         |

Duration of interview 

|  |  |
|--|--|
|  |  |
|--|--|

 Minutes

Language of interview

|   |         |
|---|---------|
| 1 | Hausa   |
| 2 | English |

On the following page there are sentences that describe some of the different ways you might think or feel about your interviewer. As you read the sentences mentally insert the name of your interviewer in place of \_\_\_\_\_ in the text. Below each statement there is a seven point scale:

|       |        |              |           |       |            |        |
|-------|--------|--------------|-----------|-------|------------|--------|
| 1     | 2      | 3            | 4         | 5     | 6          | 7      |
| Never | Rarely | Occasionally | Sometimes | Often | Very Often | Always |

If the statement describes the way you *always* feel (or think) circle the number 7; If it never applies to you, circle the number 1. Use the numbers in between to describe the variations between these extremes.

Work quickly, your first impressions are the ones we would like to see.

**PLEASE DON'T FORGET TO RESPOND TO EVERY ITEM.**

Thank You

**1** \_\_\_\_\_ and I agree about the things I will need to do in counseling to help improve my situation

|       |        |              |           |       |            |        |
|-------|--------|--------------|-----------|-------|------------|--------|
| 1     | 2      | 3            | 4         | 5     | 6          | 7      |
| Never | Rarely | Occasionally | Sometimes | Often | Very Often | Always |

**2** What I am doing in counseling gives me new ways of looking at my problem.

|       |        |              |           |       |            |        |
|-------|--------|--------------|-----------|-------|------------|--------|
| 1     | 2      | 3            | 4         | 5     | 6          | 7      |
| Never | Rarely | Occasionally | Sometimes | Often | Very Often | Always |

3 I believe \_\_\_\_\_ likes me.

|       |        |              |           |       |            |        |
|-------|--------|--------------|-----------|-------|------------|--------|
| 1     | 2      | 3            | 4         | 5     | 6          | 7      |
| Never | Rarely | Occasionally | Sometimes | Often | Very Often | Always |

4 \_\_\_\_\_ does not understand what I am trying to accomplish in counseling.

|       |        |              |           |       |            |        |
|-------|--------|--------------|-----------|-------|------------|--------|
| 1     | 2      | 3            | 4         | 5     | 6          | 7      |
| Never | Rarely | Occasionally | Sometimes | Often | Very Often | Always |

5 I am confident in \_\_\_\_\_'s ability to help me.

|       |        |              |           |       |            |        |
|-------|--------|--------------|-----------|-------|------------|--------|
| 1     | 2      | 3            | 4         | 5     | 6          | 7      |
| Never | Rarely | Occasionally | Sometimes | Often | Very Often | Always |

6 \_\_\_\_\_ and I are working towards mutually agreed upon goals.

|       |        |              |           |       |            |        |
|-------|--------|--------------|-----------|-------|------------|--------|
| 1     | 2      | 3            | 4         | 5     | 6          | 7      |
| Never | Rarely | Occasionally | Sometimes | Often | Very Often | Always |

7 I feel that \_\_\_\_\_ appreciates me.

|       |        |              |           |       |            |        |
|-------|--------|--------------|-----------|-------|------------|--------|
| 1     | 2      | 3            | 4         | 5     | 6          | 7      |
| Never | Rarely | Occasionally | Sometimes | Often | Very Often | Always |

8 We agree on what is important for me to work on.

|       |        |              |           |       |            |        |
|-------|--------|--------------|-----------|-------|------------|--------|
| 1     | 2      | 3            | 4         | 5     | 6          | 7      |
| Never | Rarely | Occasionally | Sometimes | Often | Very Often | Always |

9 \_\_\_\_\_ and I trust one another.

|       |        |              |           |       |            |        |
|-------|--------|--------------|-----------|-------|------------|--------|
| 1     | 2      | 3            | 4         | 5     | 6          | 7      |
| Never | Rarely | Occasionally | Sometimes | Often | Very Often | Always |

10 \_\_\_\_\_ and I have different ideas on what my problems are.

|       |        |              |           |       |            |        |
|-------|--------|--------------|-----------|-------|------------|--------|
| 1     | 2      | 3            | 4         | 5     | 6          | 7      |
| Never | Rarely | Occasionally | Sometimes | Often | Very Often | Always |

11 We have established a good understanding of the kind of changes that would be good for me.

|       |        |              |           |       |            |        |
|-------|--------|--------------|-----------|-------|------------|--------|
| 1     | 2      | 3            | 4         | 5     | 6          | 7      |
| Never | Rarely | Occasionally | Sometimes | Often | Very Often | Always |

12 I believe the way we are working with my problem is correct.

|       |        |              |           |       |            |        |
|-------|--------|--------------|-----------|-------|------------|--------|
| 1     | 2      | 3            | 4         | 5     | 6          | 7      |
| Never | Rarely | Occasionally | Sometimes | Often | Very Often | Always |
